# Supplementary material
Source: PubMed Central journal article supplement (PMC5237809)
Supplement: NIHMS841340-supplement-Supplemental.pdf [file NIHMS841340-supplement-Supplemental.pdf]

### Supplemental Information

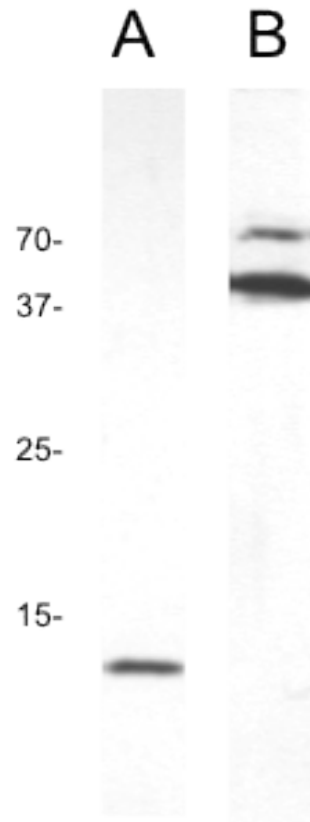

**Figure S1.** Full blots for  $\alpha$ -PVB (**A**) or  $\alpha$ -COX-2 and  $\alpha$ -actin (**B**) demonstrate antibody specificity. Prefrontal cortex or hippocampus tissue were analyzed with Western immunoblotting as described in Materials and Methods and shown in the data of Figures 1, 3 and 4. The data demonstrate signals only at the protein weights of ~12 kDa (PVB), ~70 kDa (COX-2), and ~42 kDa (actin).
